# Supplementary material for: The Siderophore Transporters Sit1 and Sit2 Are Essential for Utilization of Ferrichrome-, Ferrioxamine- and Coprogen-Type Siderophores in Aspergillus fumigatus
Source: MDPI journal article supplement (doi:10.3390/jof7090768), 2021-09-16
Supplement: s1 [file s1]

Supplementary Material

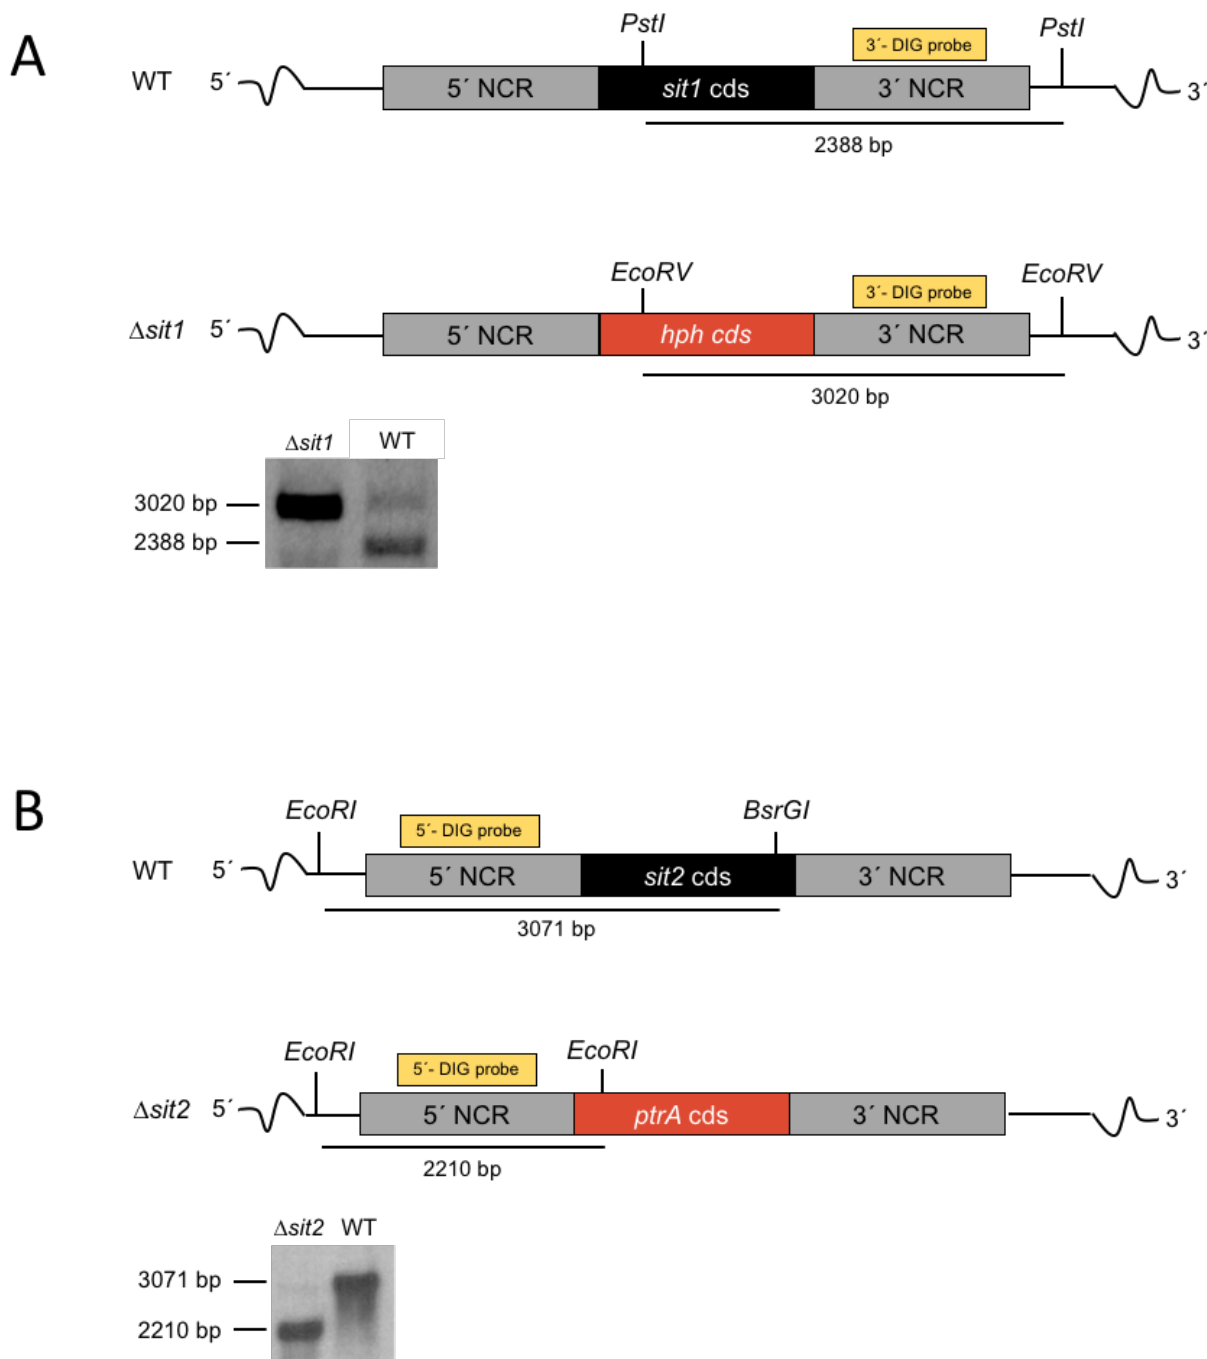

**Figure S1.** Deletion scheme of *sit1* and *sit2* genes in *A. fumigatus*. **(A)** Genomic organization of the *sit1* locus in AfS77 (wild-type) and  $\Delta sit1$ . DNA digestion with *PstI* resulted in a 2388-bp fragment for AfS77 and digestion with *EcoRV* resulted in a 3020-bp fragment for the  $\Delta sit1$ . **(B)** Genomic organization of the *sit2* locus in AfS77 and  $\Delta sit2$ . DNA digestion with *EcoRI* and *BsrGI*, resulted in a 3071-bp fragment for AfS77 and digestion with *EcoRI* resulted in a 2210-bp fragment for  $\Delta sit2$ . Southern blot analysis using respective DIG hybridization probes confirmed genetic manipulation.

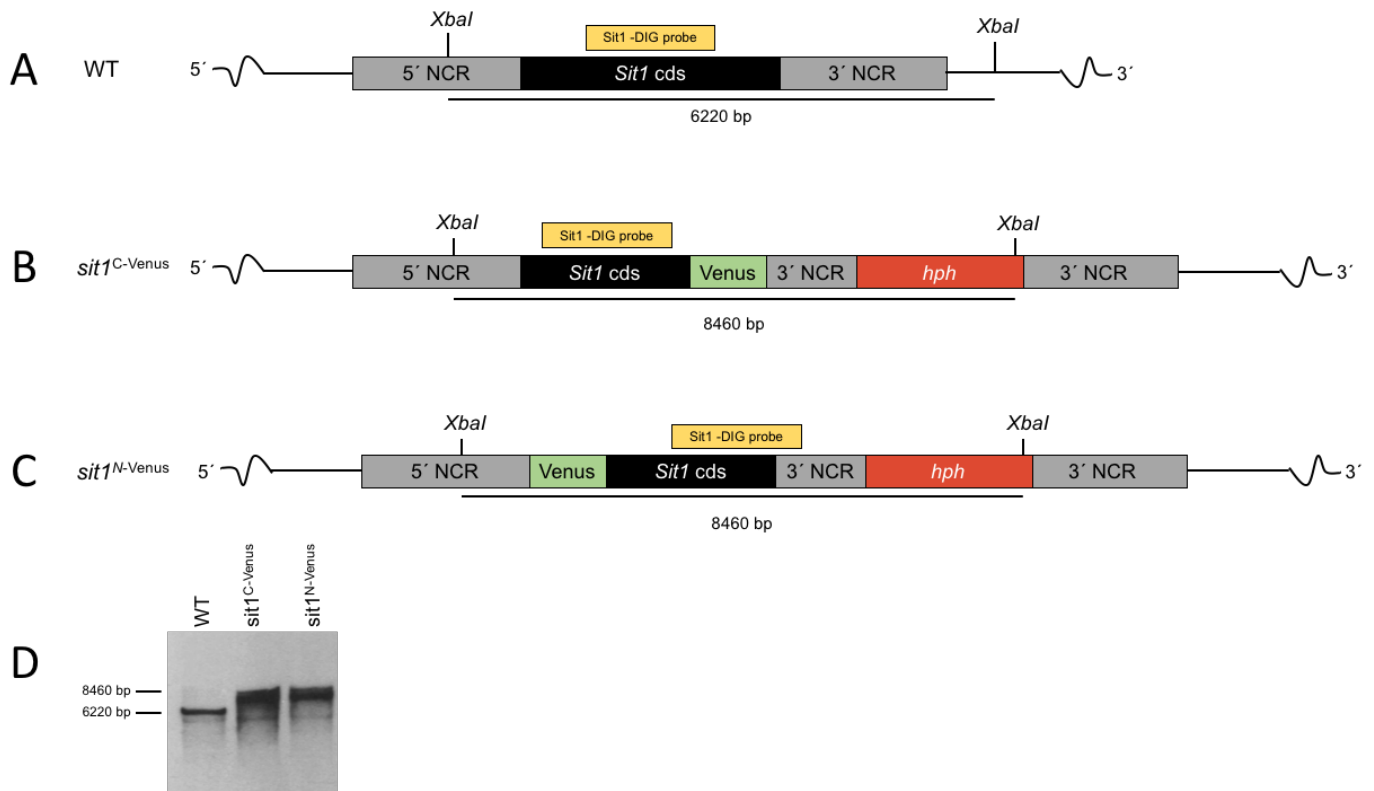

**Figure S2.** N-terminal and C-terminal Venus-tagging scheme of *sit1* in *A. fumigatus*. **(A)** Genomic organization of the *sit1* locus in AfS77 (wild-type), **(B)** Sit1-Venus at the C-terminus, **(C)** Sit1-Venus at the N-terminus. **(D)** Southern blot analysis using respective DIG hybridization probes confirmed genetic manipulation of strains. DNA digestion with *XbaI* resulted in a 6220-bp fragment for AfS77 and in an 8460-bp fragment for tagging of Sit1 with Venus.

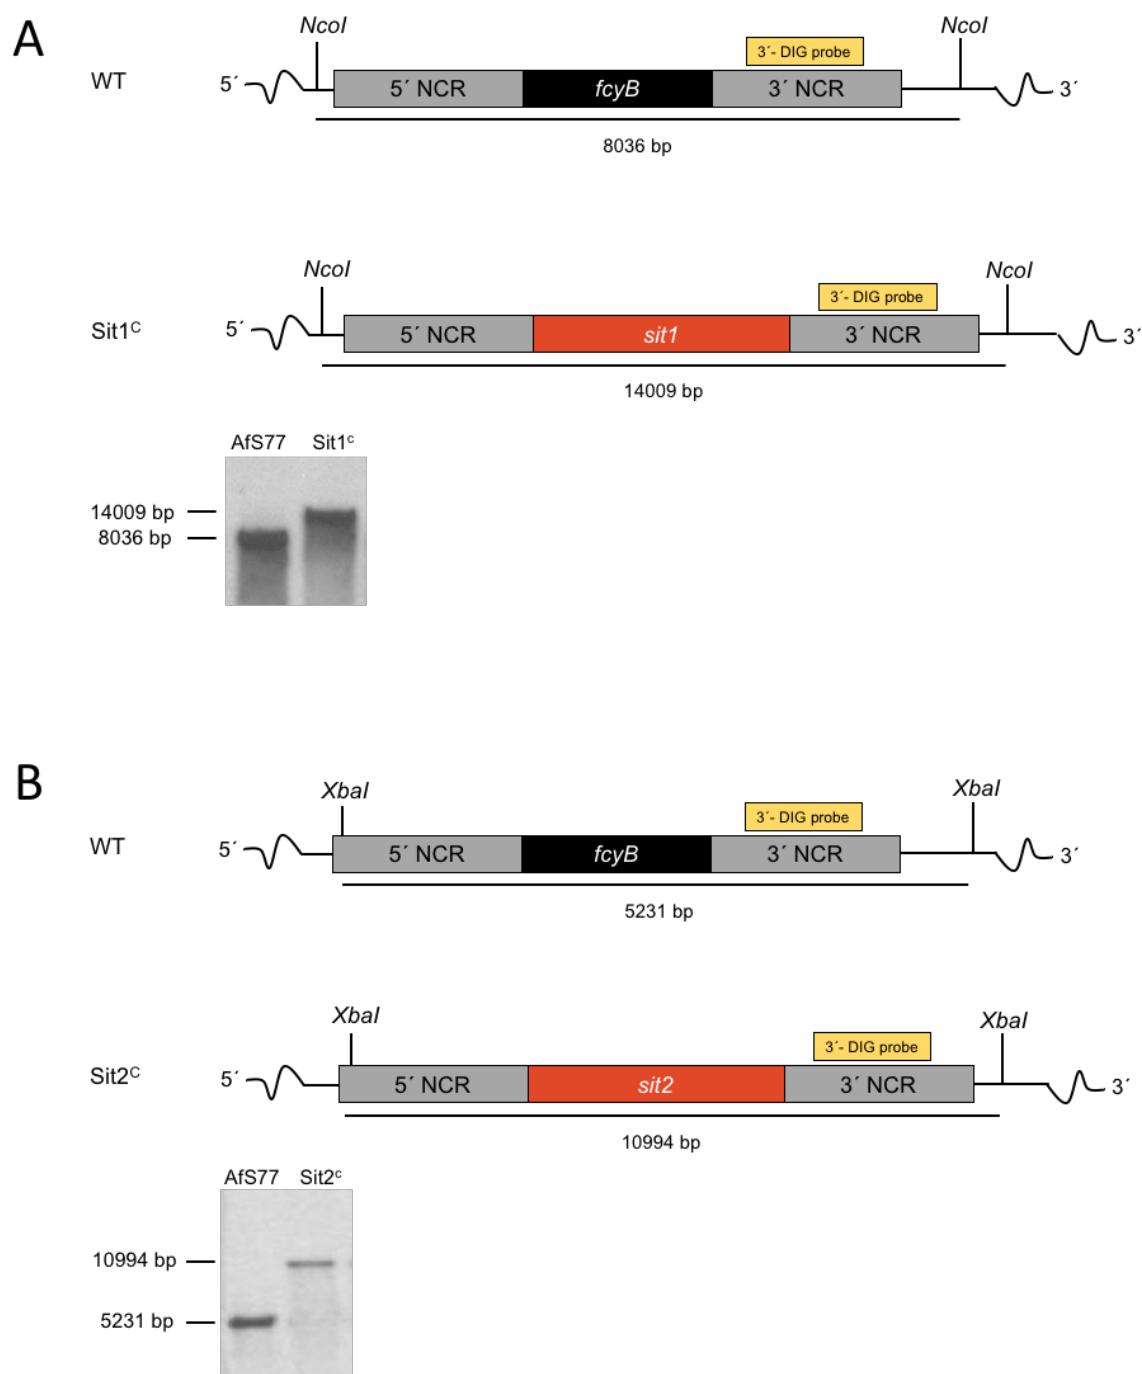

**Figure S3.** Genomic organization of the *fcyB* locus in AfS77 (wild-type) and reconstituted *sit1* and *sit2* strains. **(A)** DNA digestion with *NcoI* resulted in an 8036-bp fragment for AfS77 and a 14009-bp fragment for complemented Sit1<sup>C</sup> strain. **(B)** DNA digestion with *XbaI* resulted in a 5231-bp fragment for AfS77 and a 10994-bp fragment for complemented Sit2<sup>C</sup> strain.

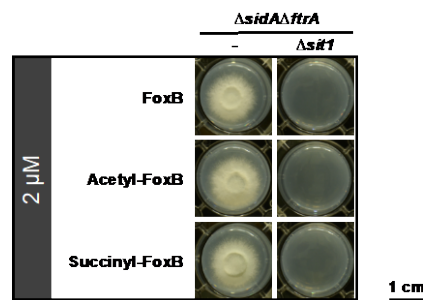

**Figure S4.** Sit1 mediates uptake of acetylated (Acetyl-FoxB) and succinylated (Succinyl-FoxB) ferrioxamine B derivatives. Utilization of the previously described [28] chemically modified FoxB derivatives was performed as described in Figure 1.

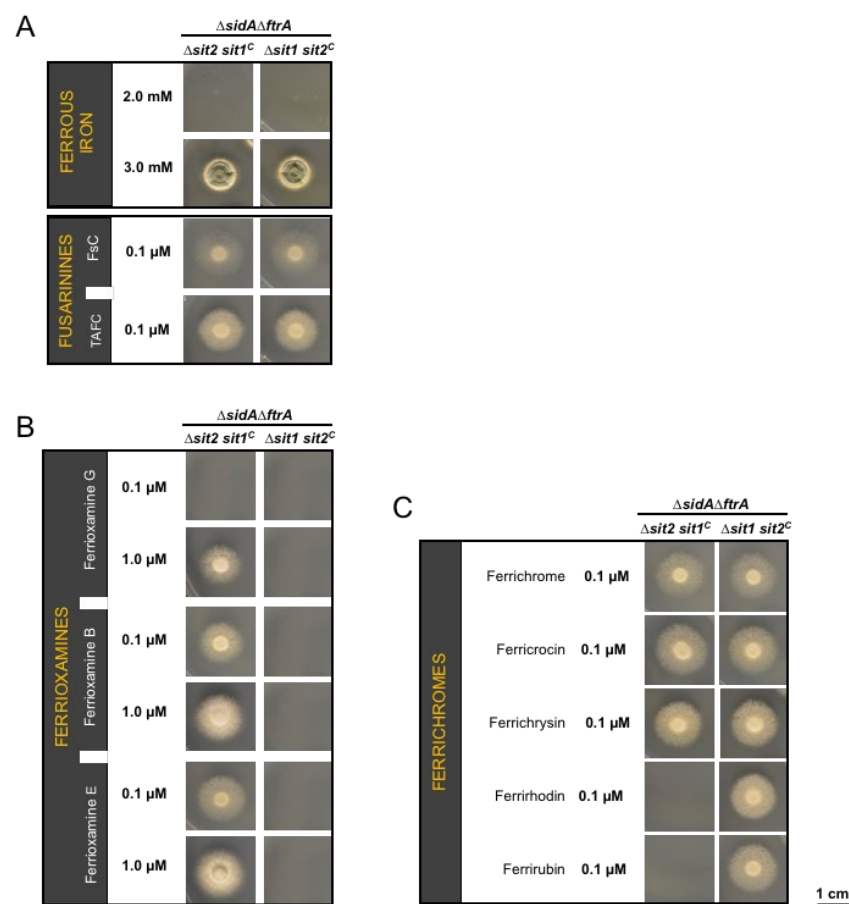

**Figure S5.** Complementation of Sit1 and Sit2. Strains were point-inoculated with  $10^4$  conidia on AMM plates supplemented with the indicated siderophore and incubated for 48 h at 37 °C. **(A)** Complemented strains showed growth on 3 mM of  $Fe^{2+}$  as well as TAFc and fusarinine C as expected **(B)** Complementation of Sit1 rescued the growth under supplementation of ferrioxamines B, E or G, while for Sit2 no growth is seen still due to the lack of Sit1 transporter. **(C)** Complementation of both Sit1 and Sit2 rescued growth under the supplementation of ferrichrome, ferricrocin and ferrichrysin supporting the role of both transporters in the uptake of these siderophores. Also, the complementation of Sit2 allowed growth under ferrirhodin and ferrirubin but not when only Sit1 was complemented, further demonstrating that Sit2 is the sole transporter for these siderophores.

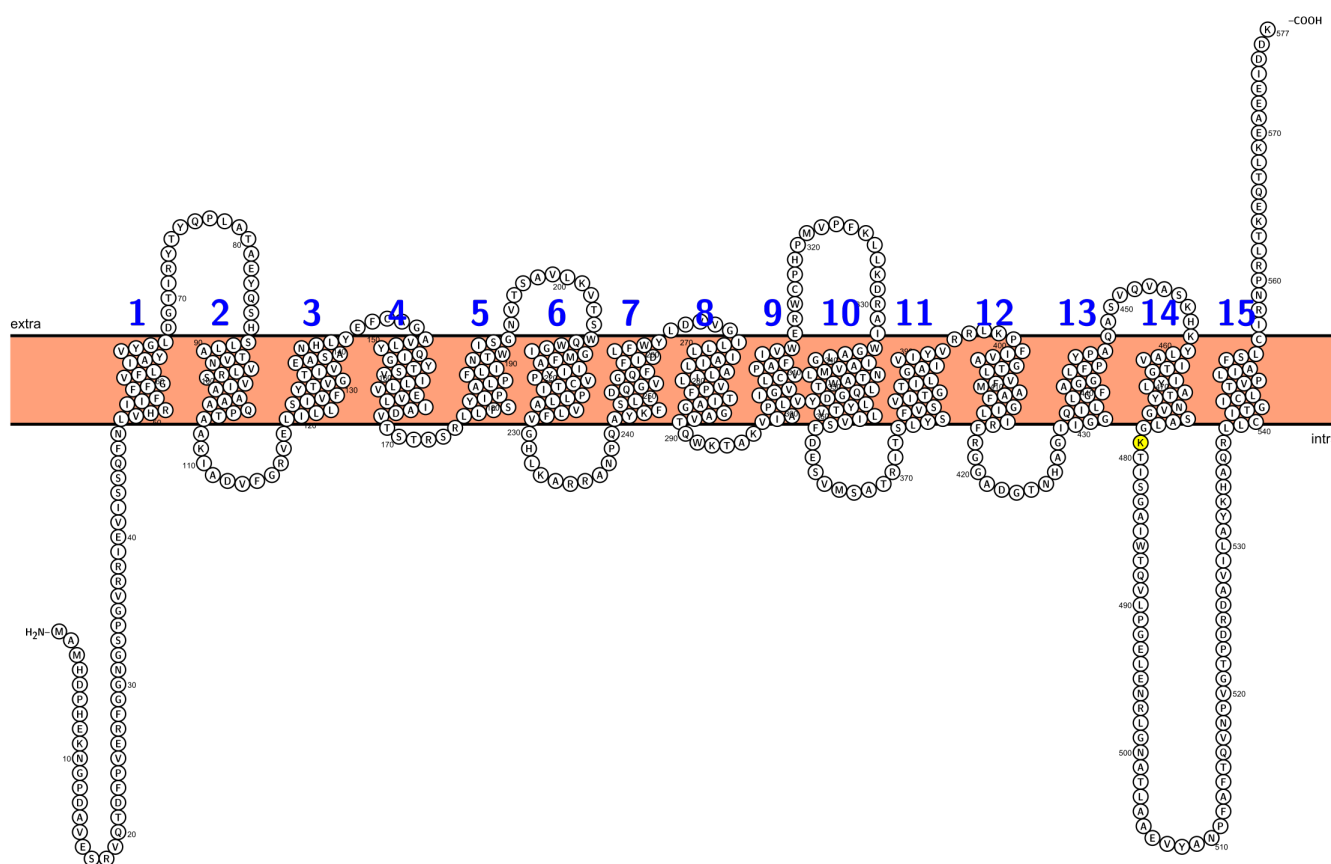

**Figure S6.** Schematic illustration of membrane topology of Sit1 with the N479K mutation according to Protter [45]. The amino acid residue change N479K (highlighted in yellow), which was found to render *A. fumigatus* resistant to VL-2397 [46], is predicted to lead to a rearrangement of the transmembrane domains in Sit1 (compare to Figure 2B).

**Figure S7.** Multiple alignment of SITs for phylogenetic analysis shown in Figure 3. The predicated protein sequence for each transporter was aligned using the Geneious Prime alignment tool [43].

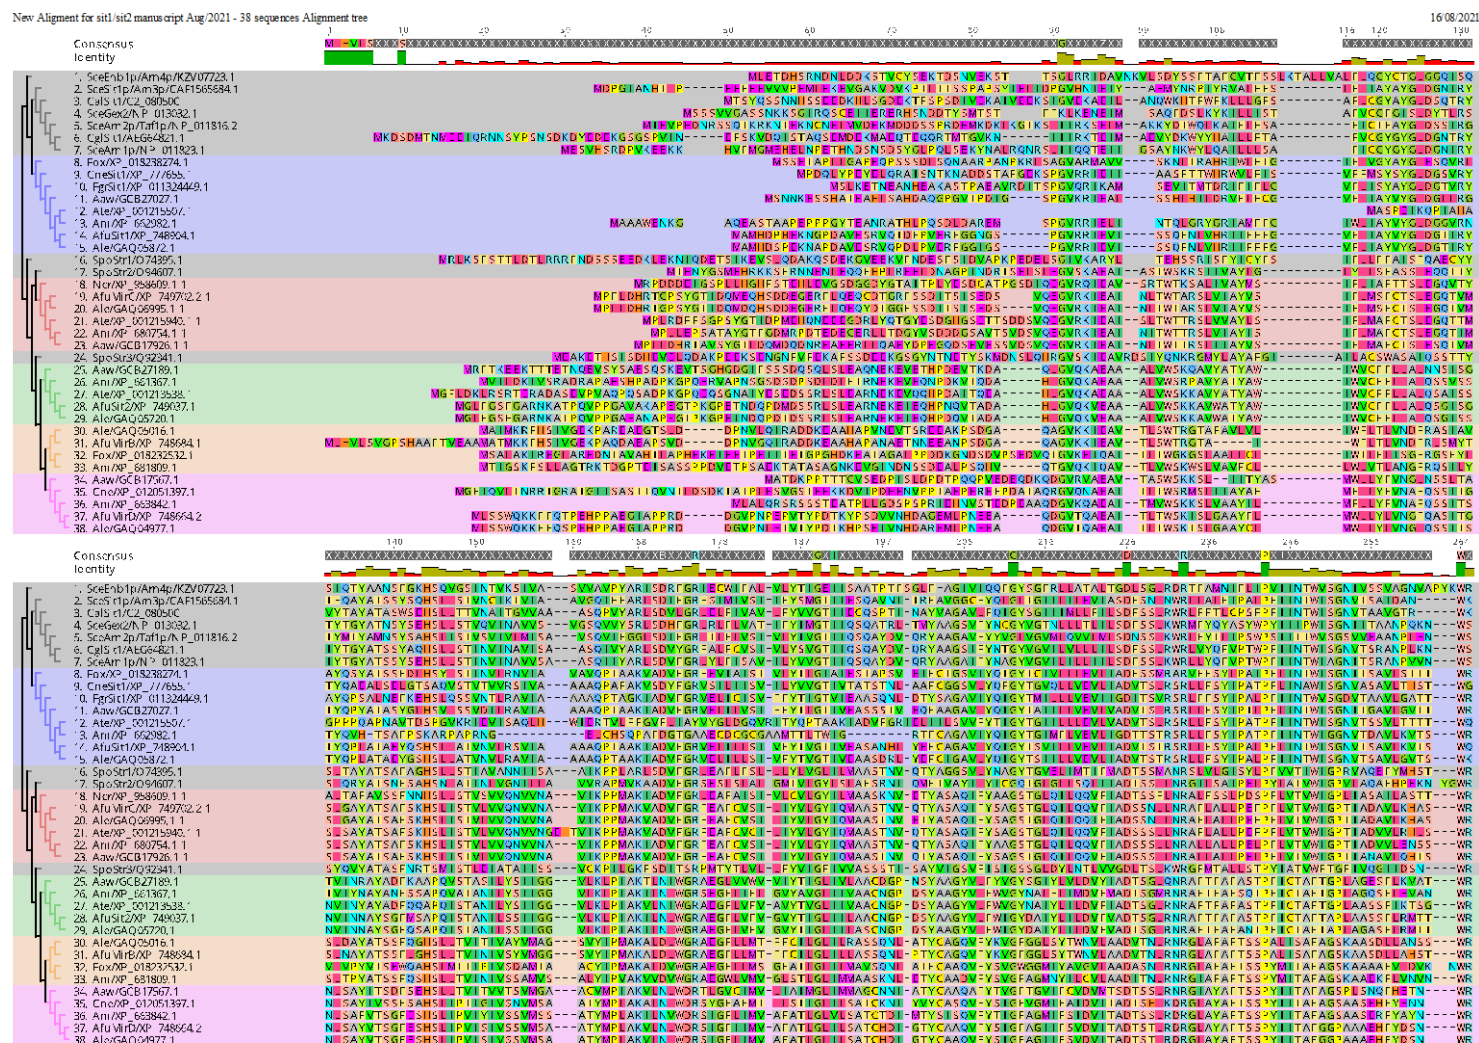

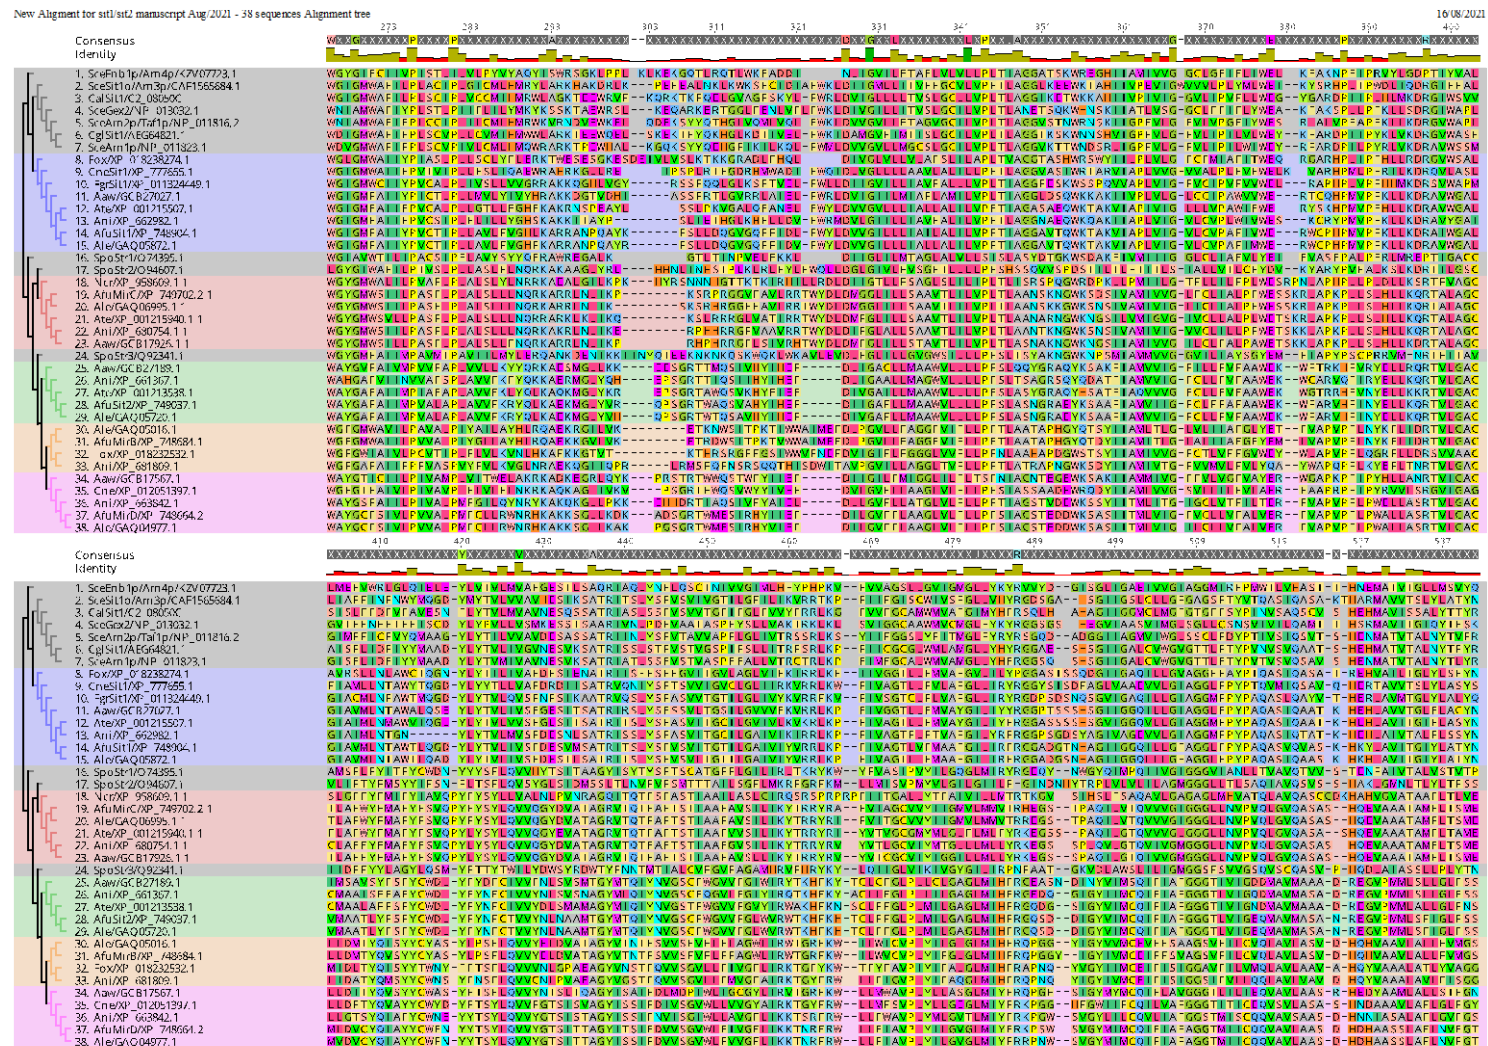

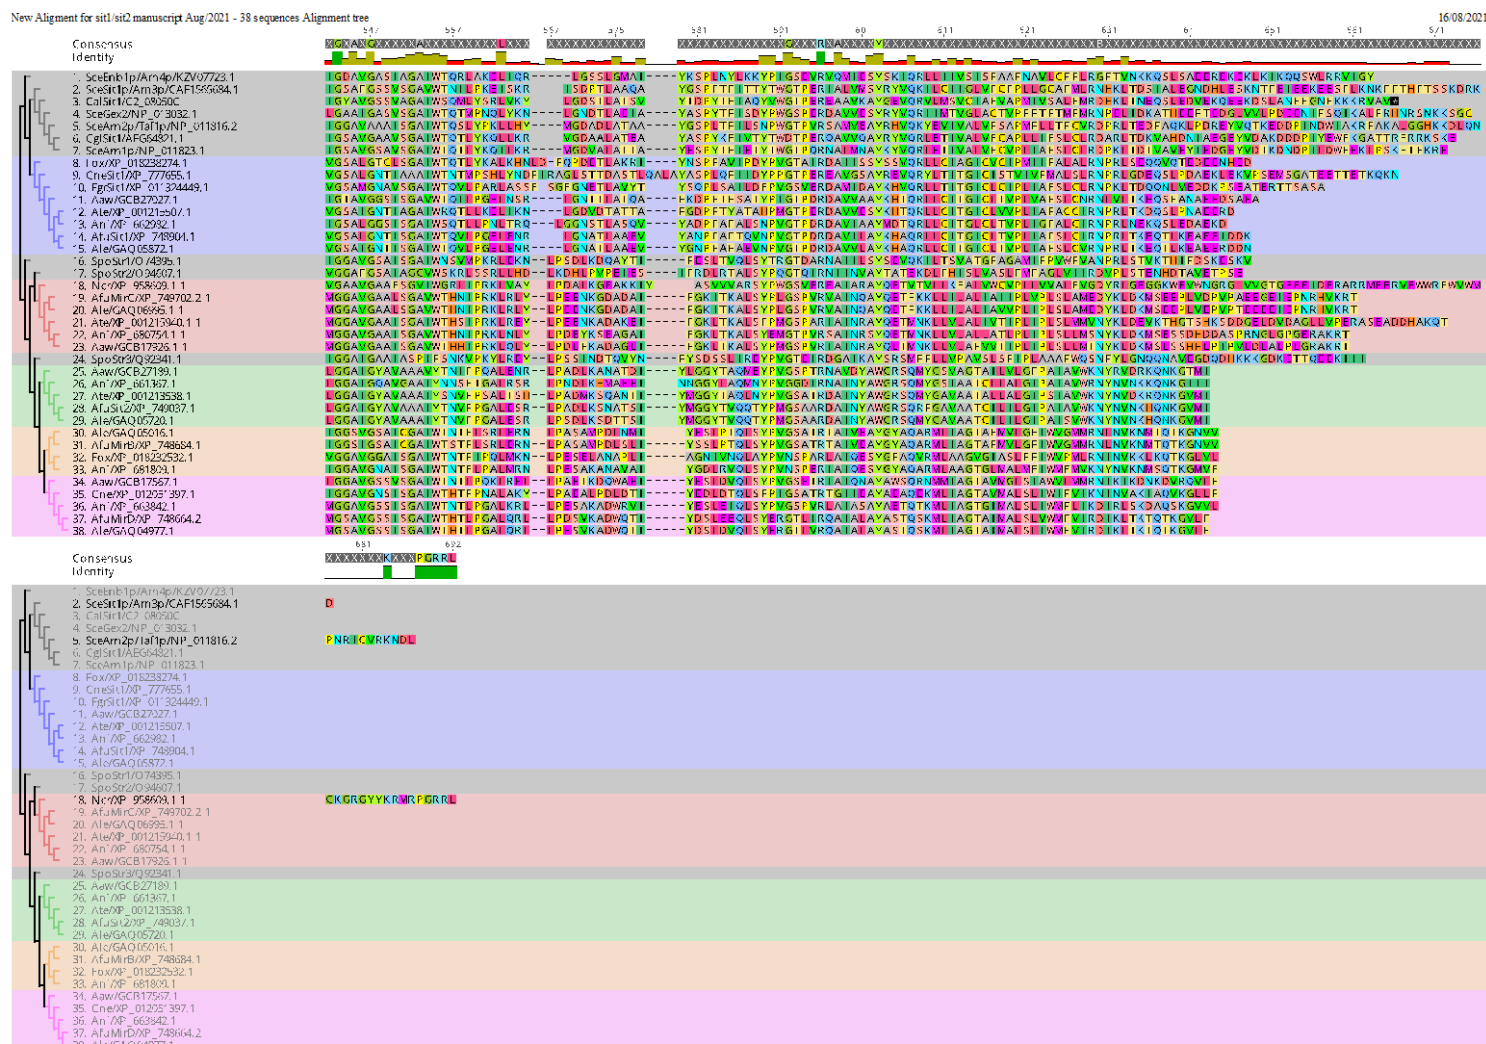

**Table S1.** *A. fumigatus* strains used in this study.

| Strain                                                                            | Description                                                                               | Reference  |
|-----------------------------------------------------------------------------------|-------------------------------------------------------------------------------------------|------------|
|  |                                                                                           |            |
| AfS77                                                                             | ATCC4664; $\Delta kuA::loxP$                                                              | [33]       |
| <i>sit1</i> <sup>N</sup> -Venus                                                   | AfS77; <i>sit1::hph-psit1</i> -Venus <sup>N</sup>                                         | this study |
| <i>sit1</i> <sup>C</sup> -Venus                                                   | AfS77; <i>sit1::hph-psit1</i> -Venus <sup>C</sup>                                         | this study |
| $\Delta sit1$                                                                     | AfS77; $\Delta sit1::hph$                                                                 | [30]       |
| $\Delta sidA\Delta ftrA$                                                          | AfS77; $\Delta sidA::six$ , $\Delta ftrA::six$                                            | this study |
| $\Delta sidA\Delta ftrA\Delta sit1$                                               | $\Delta sidA\Delta ftrA$ ; $\Delta sit1::hph$                                             | this study |
| $\Delta sidA\Delta ftrA\Delta sit2$                                               | $\Delta sidA\Delta ftrA$ ; $\Delta sit2::ptrA$                                            | this study |
| $\Delta sidA\Delta ftrA\Delta sit1\Delta sit2$                                    | $\Delta sidA\Delta ftrA$ ; $\Delta sit1::hph$ , $\Delta sit2::ptrA$                       | this study |
| $\Delta sidA\Delta ftrA\Delta sit2sit1^C$                                         | $\Delta sidA\Delta ftrA$ ; $\Delta sit1::hph$ , $\Delta sit2::ptrA$ , $\Delta fcyB::sit1$ | this study |
| $\Delta sidA\Delta ftrA\Delta sit2sit2^C$                                         | $\Delta sidA\Delta ftrA$ ; $\Delta sit1::hph$ , $\Delta sit2::ptrA$ , $\Delta fcyB::sit2$ | this study |

**Table S2.** Primers used for strains generation.

| Primer | Sequence 5'–3'                                 |
|--------|------------------------------------------------|
| MM124  | GGCATGCAAGCTTGGCGT                             |
| MM125  | GTACCGAGCTCGAATTCAGT                           |
| TO16   | AATTCGAGCTCGGTACTGCGCACAAAA GAGGACGAGCCAC      |
| TO17   | AGGACCTGAGTGATGCTCTGACAACAC GATTGGAAGTCC       |
| TO18   | ATGGTCCATCTAGTGCTTCCAGGTGGA AGCAAGTCAGG        |
| TO19   | GCCAAGCTTGCATGCCTGCGCACACTGCTTCTGACTATCATGC    |
| TO20   | AATTCGAGCTCGGTACTTTAAAGACGA TGAACACGAATTGAGAGG |
| TO21   | AGGACCTGAGTGATGCCTTGTGAGTCG CGAGGGAGACG        |
| TO22   | ATGGTCCATCTAGTGACGAGTGACCC CCAAAGAGG           |
| TO23   | GCCAAGCTTGCATGCCTTTAAATATGA CGACCTTGGTCCATG    |
| TO56   | TGCGCACAAAAGAGGACG                             |
| TO57   | CACACTGCTTCTGACTATC                            |
| TO60   | ATGAACACGAATTGAGAGG                            |
| TO61   | TGACGACCTTGGTCCATG                             |
| TO102  | AAGCTCGTCCCCTCCAG                              |
| TO105  | GCTCGGTCAGAAAGTGC                              |
| MA01   | AATTCGAGCTCGGTACCTCCGTTGTCCAGGGTCAGTACAG       |
| MA02   | AATCAATTGCTGATGTATATTATCCTCCTCC                |
| MA03   | ACATCAGCAATTGATTACGGGATCCCATTTGGT              |
| MA04   | TATCTCCCTCTTGATCTTTGTTTGTATTATA                |
| MA05   | ATGCAAGAGGGAGATAATTCTAAAGTATATGT               |
| MA06   | GCCAAGCTTGCATGCCGTTGGCCTGCAACGAGGCTTGTC        |
| MA07   | AGTGAATTCGAGCTCGGTACAAGCTCGTCCCCCTCCAGC        |
| MA12   | TGTACCTAGGCTCTGATGGCGAATACGATCTTTTC            |
| MA13   | GCCATCAGAGCCTAGGTACAGAAAGTCCAATTG              |

|      |                                                |
|------|------------------------------------------------|
| MA14 | GATTAGTATATCTAGAAAGAAGGATTACCTC                |
| MA15 | TCTTTCTAGATATACTAATCTTCTAAAAATAACGC            |
| MA16 | TTACGCCAAGCTTGCATGCCGATACATATTCGTATCTTATGTCTG  |
| MA17 | TGCTGACCATTTCGAGATCGTCACTGGTATAG               |
| MA18 | CGATCTGCGAATGGTCAGCAAGGGCGAG                   |
| MA19 | CCGGACCCGGACCCCTTGACAGCTCGTCCATGC              |
| MA20 | GCTGTACAAGGGGTCCGGGTCCGGGTCCATGAACATGGCGATGCAC |
| MA53 | AATCATGGTCATAGCTGTTTGCTGGAGCAATGGGACGG         |
| MA54 | GAGCGGATAACAATTTACATCTGGATTTTTGCCGACTTTGT      |
| MA55 | AATCATGGTCATAGCTGTTTCGACCCATAAAGCGTCATCAG      |
| MA56 | GAGCGGATAACAATTTACACAGAGGACTGAGCTCCGATC        |

**Table S3.** Primers used for the generation of digoxigenin-labelled probes for Southern analysis.

| Probe                                                                            | Gene                    | Sequence 5'–3'                          |
|----------------------------------------------------------------------------------|-------------------------|-----------------------------------------|
| 3' NCR <i>sit1</i>                                                               | AFUA_7G06060            | AAGCTCGTCCCCTCCAG                       |
|                                                                                  | siderophore transporter | CCATTAGTGGTGGGGTTC                      |
| <i>sit1</i> -CDS                                                                 | AFUA_7G06060            | AGAACCAACCATGAACATGGCGATGCAC            |
|                                                                                  | siderophore transporter | TTACGGATGATTTATCATCAATCTCCTCCG          |
| 5' NCR <i>sit2</i>                                                               | AFUA_7G04730            | CATGCTCGAGAAACCAATG                     |
|                                                                                  | siderophore transporter | TGGAGGAGGAGAAGAGTG                      |
| 3' NCR <i>fcyB</i><br>(for <i>sit1<sup>c</sup></i> and <i>sit2<sup>c</sup></i> ) | AFUA_2G09860            | GCTCTGAACGATATGCTCCCTGCGGTTTTTGGGTTTTAT |
|                                                                                  | cytosine transporter    | CACACTGGGTCTGAAGACGA                    |
